# Supplementary material for: Convergent evolution of hemoglobin switching in jawed and jawless vertebrates
Source: PubMed Central journal article supplement (PMC4736134; doi:10.1186/s12862-016-0597-0), 2016-02-01
Supplement: 12862_2016_597_MOESM1_ESM.pdf [file 12862_2016_597_MOESM1_ESM.pdf]

**Additional Table A1.** Oligonucleotides used for RT-PCR and qRT-PCR

| <b>Gene</b>  | <b>Label</b>                                                             | <b>5'-3' sequence</b>                                                                                          |
|--------------|--------------------------------------------------------------------------|----------------------------------------------------------------------------------------------------------------|
| <b>aHb1</b>  | Pma_aHb1_for<br>Pma_aHb1_rev<br>Pma_aHb1_qpcr_f<br>Pma_aHb1_qpcr_r       | GACTCTGGAAGTGTCCCAG<br>GCTCAGGTCCAGCTACTGA<br>CAGCACCTTGAAGTACTGGGGGTC<br>GCTCATCTTCTCGGTGTCGTCCATG            |
| <b>aHb5a</b> | PmaGb2for<br>PmaGb2rev<br>PmaGb08qPCRfor<br>PmaGb08qPCRrev               | ATGCCTATCGTTGACACTGGA<br>TTAGTAGGCGGACCTGAGC<br>CCGGTGTGGACATCCTGGTGAAGTTCT<br>ACGTCCGCGGATTTCTTGAGCTGA        |
| <b>aHb6</b>  | Pma_aHb6_for<br>Pma_aHb6_rev<br>Pma_aHb6_qpcr_f<br>Pma_aHb6_qpcr_r       | TGAGCAGTTTCAAGGAGGATGAA<br>TCTTGGTTCGAAGCTGCTGA<br>AGCTGTGCTCGACTTGGACGATC<br>CCCGCCTACTTCAAGACGTTTGCAGA       |
| <b>aHb7</b>  | Pma_aHb7_for<br>Pma_aHb7_rev<br>Pma_aHb7_qpcr_f<br>Pma_aHb7_qpcr_r       | TCTCGGACGAGGAGAAGAAG<br>ATCTGCATCAGCCTCAAAGT<br>CCGAAAAGAACGCCAAGAATCTGAAGGAGC<br>CAAGTTCTTCAAGGTCCTGGCTGAGC   |
| <b>aHb11</b> | Pma_aHb11_for<br>Pma_aHb11_rev<br>Pma_aHb11_qpcr_f<br>Pma_aHb11_qpcr_r   | ATGCCTATTGTCGACTCGGGAAGC<br>GCATCCTGCTGAAGTCCAGTACTAG<br>CCCGAGAAGCAGAGCCTGAAGC<br>GACCCCAGTATTTCAAGGTGCTGTCTG |
| <b>aHb12</b> | Pma_aHb14_for<br>Pma_aHb14_rev<br>Pma_aHb12N_qpcr_f<br>Pma_aHb12N_qpcr_r | GACTCTGGAAGCGTTGGG<br>GGTGGTGATCCTGCTCAAG<br>GCCTTAGACGACCCCCCGAAG<br>TACTTCAAGGTTCTGGCTGGAGTCATTTCCG          |
| <b>aMb1</b>  | PmaGb17_for<br>PmaGb17_rev<br>PmaGb17_qPCR_for<br>PmaGb17_qPCR_rev       | ATGAGCATTGCAGACAGC<br>GAATGCAGATTTCAAGCCAATGC<br>CCACGCAGAGGACCACGGAACC<br>CAGCGCCTGGAACCTTGGGGAAG             |
| <b>aMb2</b>  | PmaGb23_for<br>PmaGb23_rev<br>PmaGb23_qPCR_for<br>PmaGb23_qPCR_rev       | ATGAGTGCCATCGTGGAC<br>GCCTAGAAAGCCGAGCG<br>GCCAAGCTGCACTCGCTGAGC<br>GTCTCGCCAGGATGTGAGC                        |
| <b>Cygb</b>  | PmaGb30for<br>PmaGb30rev<br>PmaGb30qPCRfor<br>PmaGb30qPCRrev             | ATGGAGCAGGGCTGGCTGT<br>CTAGGCCGCTGCTTGCTCC<br>CGTCAAGTACTACCACATCTTGGGCGG<br>AGGGTGCCAGCAGCTTCGTC              |
