# Supplementary material for: Convergent evolution of hemoglobin switching in jawed and jawless vertebrates
Source: PubMed Central journal article supplement (PMC4736134; doi:10.1186/s12862-016-0597-0), 2016-02-01
Supplement: 12862_2016_597_MOESM2_ESM.pdf [file 12862_2016_597_MOESM2_ESM.pdf]

**Additional Fig. A1.** Sequence alignment (FASTA format) of the globin sequences of *P. marinus*.

```
>aHb1
-MPIVDS-----GSVPALTAAEKATIRTA
WAPVYAKYQSTGVDILIKFFTSNPAAQAFPPKFQGLTSADQLKKSMDVRWHAERI INAVN
DAVVAMDDTEKMSLKLRELSGKHAKSFQ-VDPQYFKVLAAVIVDTVLP-----GDA
GLEKLMSMICILLRSSY-----
>aHb2a
-MPIVDT-----GSVAPLSAAEKTIRSA
WAPVYSNYETSGVDILVKFFTSTPAAQEFFPKFKGLTTADQLKKSADVRWHAERI INAVN
DAVVSMDDEKMSMKLRDLGKHAKSFQ-VDPQYFKVLAAVIADTVAA-----GDA
GFEKLMSMICILLRSAY-----
>aHb2b
-MPIVDT-----GSVAPLSAAEKTIRSA
WAPVYSNYETSGVDILVKFFTSTPAAQEFFPKFKGLTTADQLKKSADVRWHAERI INAVN
DAVVSMDDEKMSMKLRDLGKHAKSFQ-VDPQYFKVLAAVIADTVAA-----GDA
GFEKLMSMICILLRSAY-----
>aHb2c
-MPIVDT-----GSVAPLSAAEKTIRSA
WAPVYSNYETSGVDILVKFFTSTPAAQEFFPKFKGLTTADQLKKSADVRWHAERI INAVN
DAVVSMDDEKMSMKLRDLGKHAKSFQ-VDPQYFKVLAAVIADTVAA-----GDA
GFEKLMSMICILLRSAY-----
>aHb5a
-MPIVDT-----GSVAPLSAAEKTIRSA
WAPVYSTYETSGVDILVKFFTSTPAAQEFFPKFKGLTTADQLKKSADVRWHAERI INAVN
DAVASMDDEKMSMKLRDLGKHAKSFQ-VDPQYFKVLAAVIADTVAA-----GDA
GFEKLMSMICILLRSAY-----
>aHb5b
-MPIVDS-----GSVAPLSAAEKTIRSA
WAPVYSTYETSGVDILVKFFTSNPAAQEFFPKFKGLTTADQLKKSADVRWHAERI INAVN
DAVASMDDEKMSMKLRDLGKHAKSFQ-VDPQYFKVLAAVIADTVAA-----GDA
GFEKLMSMICILLRSAY-----
>aHb5d
-MPIVDS-----GSVAPLSAAEKTIRSA
WAPVYSTYETSGVDILVKFFTSNPAAQEFFPKFKGLTTADQLKKSADVRWHAERI INAVN
DAVASMDDEKMSMKLRDLGKHAKSFQ-VDPQYFKVLAAVIADTVAA-----GDA
GFEKLMSMICILLRSAY-----
>aHb8
-MPIVDS-----GSVAPLSAAEKTIRSA
WAPVYSNYETSGVDILVKFFTSTPAAQEFFPKFKGLTTADQLKKSADVRWHAERI INAVN
DAVTSMDDEKMSMKLRDLGKHAKSFQ-VDPQYFKVLAAVIADTVAA-----GDA
GFEKLMSMICILLRSAY-----
>aHb3
-MPIVDS-----GSVAPLSAAEKTIRSA
WAPVYSNYETTGV DILVKFFTSTPAAQEFFPKFKGLTTADQLKKSADVRWHAERI INAVN
DAVVSMDDEKMSMKLGDLSGKHAKSFQ-VDPQYFKVLAAVIADTVAA-----GDA
GFEKLMSMICILLRSAY-----
>aHb9
-MPIVDS-----GSVAPLSAAEKTIRSA
WAPVYSNYEEAGKAILIKFFTSNPGVQDFFPKFGLDSADQLSKSAAVRWHAERI INAVN
DAVVALDDPEKLSLKLKALSCKHAQEFN-VDPQYFKVLAVNIVEGVSSANG-GLGAEAQA
AWKFLSQVSILLKSQY-----
>aHb11
-MPIVDS-----GSAGLSAAEKAIITDS
WKVVYADYEAAGKAILIKFFTSNPGVQDFFPKFGLDSADQLSKSAAVRWHAERI INAVN
DAVVALDDPEKQSLKALSCKHAQEFN-VDPQYFKVLSANVLEQVAAANG-GLSAEAQG
AWKLLSIIISILLKSQY-----
>aHb10
```

-MPIVDS-----GSVGALSASEKAAVAGS  
WKAVYANYEAAGKAVLIKFFTSNPGVQDFFPKFKGLDSADKLSKSPAVRWHAERI INAVN  
DSVVALDDPEKQSLKALKALSQKHAYEFH-VDSQYFKVLSATILEQVDDANG-GLSAEGKS  
GWEKLLSSICIHLSAY-----

>aHb12

-MPIVDS-----GSVGEFSAAEKSLIVSA  
WAPVYAKYEEAGVDILVKFFSDNPGVQDFFPKFKGLDSADQLKKSPAVRWHAERI INAVN  
DAVVALDDPPKLSLKLKALSQKHAQELN-VDPQYFKVLAGVISDAVAK-----SGDEKA  
AVDKFLSQVVILLKFAY-----

>aHb13

-MPIVDS-----GSVGAI SAAEKSLIVSA  
WAPVYAKYEEAGVDILVKFFAANPEAQAFFPKFKGLDSADQLKKSPAVRWHAERI INAVN  
DAVVALDDPAKQSLQLKALSQKHAHELN-VDPSYFKVLAGVISDAVAK-----SGDAKA  
AVDKFLSQVVILLKSAY-----

>aHb14

-MPIVDS-----GSVGAI SAAEKSLIVSA  
WAPVYAKYEEAGVDILVKFFAANPEAQAFFPKFKGLDSADKLLKKSPAVRWHAERI INAVN  
DAVVALDDPAKQSLQLKALSQKHAHELN-VDPSYFKVLAGVISDAVAK-----SGDAKA  
AVDKFLSQVVILLKSAY-----

>aHb7

-MPIEDT-----GSKPDFSDEEKKAIKDS  
WSGVYSEYESASSEILIKFFVDNPSAQDFFPKFKDL DSEEKLNSTAVRWHAERI INAVN  
DVIWLLDEPEKNAKLNKELSEKHAVQLN-VDAKFFKVLAE LILDKVAEKSGDSFSDSARS  
AWEKLLTYICISLKVAY-----

>aMb1

-MSIADS-----GSAPALSGDEKSAVRDT  
WKVVYPHAEDHGTTILIKFLTENADAKFFPKFQALKTADEMKSSPVL RDHAKRIMNS IN  
DMVVALDDTNAQNAQMNGLSKKHANDFK-VDPKYFKVISNVILSVIAEGLGAQFNDAAKN  
GWSKLLTTTCIGLKSFAF-----

>aMb2

MSAIVDS-----GSAPALSGDEKAAIKST  
WPSVFKAEDVGAEMLSRFISSNADVKKYFPKFKDISSQAE LKSSAKVRDHAKRIMAF IN  
DLVDNIDNAGAQTAKLHLSLSAEHAEKFK-VDPQYFKVISNVLLDILGETFGASFSGATRS  
AWIKLLSIICIGLRSFAF-----

>aHb6

MGALQDS-----GIVSSFKEDEKAALRES  
WDIFNNSHQDAGVKILARFI INNPEAKKFFPKFKGLNTAEELQNSAEVRIHGDKILAAVQ  
QAVLDLDDPKQKNKLDLSKSHAQQFN-VEPAYFKTFAEVILKYVTETTCGKSFTSEMRT  
SWSKLLSLIIIEELQSAY-----

>Cygb

-----MEQGWLSEEEIEALQDI  
WEKVFKSAEDVGVILLVRLFTGHPASKQYFPMFKDLETADDLKASAKLRWHAGRVMGSLD  
KAVRSLRKPEELIKILRAVGLSHARKATPVDVYYHILGGIIMDV LLETFKDELSPTARS  
AWTKLLGTLCTEFENAYREE-----GVLEQAAA

>GbX1

MGCTVSTDERTGAQSSSQGQSASRKQQQPEQQRAAGEGHQPPGPPQAPSESQRRLVDRS  
WLALQCDIARVGVIMFVRLFETHPECKDVFYQFRDCEDLQK LKMNKQLQAHGLRVMSFIE  
KSVARLEQECVLEQLIVEMGRKH-YKYN-ASPKYYSFVGIEFIATVQPFLQEKWTNEVED  
AWQCLFRYIAAVMKRGYLEEEEAASNGVNTANYDRGQGNHGATAM
